# Supplementary material
Source: publisher figshare collection journal article supplement (https://sage.figshare.com/ndownloader/files/14893580)
Supplement: Supplementary file 1 [file 14893580]

**Supplemental Table S1:** Summary of findings (GRADE) for the effectiveness of interventions compared to no treatment control

| PFMT alone                |                                 |                           |                          |                                   |                                              |
|---------------------------|---------------------------------|---------------------------|--------------------------|-----------------------------------|----------------------------------------------|
| Outcomes                  | Illustrative comparative risks* |                           | Relative effect (95% CI) | No of Participants (studies)      | Quality of the evidence (GRADE) <sup>#</sup> |
|                           | Assumed risk                    | Corresponding risk        |                          |                                   |                                              |
|                           | Control                         | PFMT alone                |                          |                                   |                                              |
| EF at 12- months          | Study population                |                           | RR 0.96 (0.85 to 1.07)   | 734 (2 studies) <sup>25, 26</sup> | ⊕⊕⊕⊖<br><b>Moderate<sup>a</sup></b>          |
|                           | 598 per 1000                    | 574 per 1000 (508 to 640) |                          |                                   |                                              |
|                           | Moderate                        |                           |                          |                                   |                                              |
|                           | 603 per 1000                    | 579 per 1000 (513 to 645) |                          |                                   |                                              |
| Climaturia at 12- months  | Study population                |                           | RR 1.01 (0.96 to 1.07)   | 542 (2 studies) <sup>25, 26</sup> | ⊕⊕⊕⊖<br><b>Moderate<sup>a</sup></b>          |
|                           | 879 per 1000                    | 887 per 1000 (844 to 940) |                          |                                   |                                              |
|                           | Moderate                        |                           |                          |                                   |                                              |
|                           | 881 per 1000                    | 890 per 1000 (846 to 943) |                          |                                   |                                              |
| PFMT plus ES              |                                 |                           |                          |                                   |                                              |
| Climacturia at 15- months | Control                         | PFMT plus ES              | RR 15.6 (0.95 to 254.91) | 31 (1 study) <sup>28</sup>        | ⊕⊕⊖⊖<br><b>Low<sup>b,c,d</sup></b>           |
|                           | Study population                |                           |                          |                                   |                                              |
|                           | 0 per 1000                      | 0 per 1000 (0 to 0)       |                          |                                   |                                              |
|                           | Moderate                        |                           |                          |                                   |                                              |
|                           | 0 per 1000                      | 0 per 1000 (0 to 0)       |                          |                                   |                                              |
| PFMT plus ES              |                                 |                           |                          |                                   |                                              |
| EF at 12- 15 months       | Control                         | PFMT plus ES              | RR 1.45 (0.87 to 2.41)   | 98 (2 studies) <sup>27, 28</sup>  |                                              |
|                           | Study population                |                           |                          |                                   |                                              |
|                           | 315 per 1000                    | 456 per 1000 (274 to 759) |                          |                                   |                                              |

|                 |                  |                                                                                              |                            |                                   |                                          |
|-----------------|------------------|----------------------------------------------------------------------------------------------|----------------------------|-----------------------------------|------------------------------------------|
|                 | Moderate         |                                                                                              |                            |                                   | ⊕⊕⊕⊕                                     |
|                 | 314 per 1000     | 455 per 1000<br>(273 to 757)                                                                 |                            |                                   | <b>Very low</b> <sup>d,e,f</sup>         |
| PFMT plus BFB   |                  |                                                                                              |                            |                                   |                                          |
| EF at 3-months  |                  | The mean of 3 months in the intervention groups was 4.44 higher (3.37 lower to 12.25 higher) |                            | 112 (2 studies) <sup>24, 29</sup> | ⊕⊕⊕⊕<br><b>Very low</b> <sup>d,g,h</sup> |
| PFMT plus BFB   |                  |                                                                                              |                            |                                   |                                          |
| EF at 12-months | Control          | PFMT plus<br>BFB n,%                                                                         |                            |                                   |                                          |
|                 | Study population |                                                                                              | RR 3.65<br>(1.02 to 13.05) | 105 (2 studies) <sup>29, 30</sup> | ⊕⊕⊕⊕<br><b>Very low</b> <sup>d,i</sup>   |
|                 | 38 per 1000      | 138 per 1000<br>(38 to 492)                                                                  |                            |                                   |                                          |
|                 |                  |                                                                                              |                            |                                   |                                          |
|                 | Moderate         |                                                                                              |                            |                                   |                                          |
|                 | 63 per 1000      | 230 per 1000<br>(64 to 822)                                                                  |                            |                                   |                                          |

**Note:** BFB = Biofeedback; ES = Electrical Stimulation; EF = Erectile Function; GRADE = Grading of Recommendations, Assessment, Development, and Evaluation; PFMT = Pelvic Floor Muscle Training; RR = Risk Ratio.

\*The basis for the **assumed risk** (e.g. the median control group risk across studies) is provided in footnotes. The **corresponding risk** (and its 95% confidence interval) is based on the assumed risk in the comparison group and the **relative effect** of the intervention (and its 95% CI).

#GRADE Working Group grades of evidence

**Moderate quality:** Further research is likely to have an important impact on our confidence in

the estimate of effect and may change the estimate.

**Low quality:** Further research is very likely to have an important impact on our confidence in the estimate of effect and is likely to change the estimate.

**Very low quality:** We are very uncertain about the estimate.

<sup>a</sup>Lack of therapist and assessor blinding in two<sup>25, 26</sup> studies.

<sup>b</sup>Therapist, assessor not blinded and lack of allocation concealment in one study<sup>28</sup>.

<sup>c</sup>Inconsistency-Not applicable, single study.

<sup>d</sup>Very wide CI.

<sup>e</sup>Therapist and assessor not blinded in two studies<sup>27, 28</sup>; dropout rate >15% in one study<sup>27</sup>; and lack of allocation concealment in one study.<sup>28</sup>

<sup>f</sup>Likely to be industry sponsored.<sup>27</sup>

<sup>g</sup>Therapist and assessor not blinded in two studies.<sup>24, 29</sup>

<sup>h</sup>Evidence of heterogeneity ( $I^2 > 50\%$ ) across studies.

<sup>i</sup>Lack of allocation concealment and dropout rate >15% in one study<sup>30</sup>; Therapist and assessor not blinded in two studies.<sup>29, 30</sup>

## Supplementary Appendix 1: Search terms and search strategy

| Subject areas                                 | Search terms used                                                                                                                                                                         |
|-----------------------------------------------|-------------------------------------------------------------------------------------------------------------------------------------------------------------------------------------------|
| Prostatectomy<br><br>AND                      | (prostatectomy) OR (radical prostatectomy) OR (transurethral resection of prostate) OR (prostatic Neoplasms) OR (prostatic hyperplasia) OR (prostate cancer) OR (prostate cancer surgery) |
| Sexual dysfunction<br><br>AND                 | (sexual dysfunction) OR (erectile dysfunction) OR (penile erection) OR (climaturia)                                                                                                       |
| Physiotherapy<br><br>Interventions<br><br>AND | (pelvic floor muscle exercise) OR (pelvic floor muscle strengthening) OR (pelvic floor muscle training) OR (electrical stimulation) OR (biofeedback) OR physiotherapy                     |
| Randomised<br><br>Controlled Trial            | (RCT) OR (random allocation) OR (randomised controlled tria*)<br><br>OR (randomised controlled clinical trial)                                                                            |

## **Supplementary Appendix 2: Excluded studies and reasons for exclusion**

1. Speakman M, 2004

Pelvic Floor Exercises for Treating Post-Micturition Dribble in Men With Erectile Dysfunction: A Randomised Controlled Trial.

Reason: Ineligible outcome measures.

2. Laurienzo CE 2018

Reason: Pelvic floor muscle training and electrical stimulation as rehabilitation after radical prostatectomy: a randomised controlled trial.

Reason: Data reported as median and range

3. Dorey G, 2005

Pelvic floor exercises for erectile dysfunction

Reason: Data reported as graphical format.

4. Van Kampen M, 2003

Treatment of erectile dysfunction by perineal exercise, electromyographic biofeedback, and electrical stimulation. Physical therapy. 2003 Jun 1;83(6):536-43.

Reason: Not RCT.

5. Lavoisier P, 2014

Pelvic-floor muscle rehabilitation in erectile dysfunction and premature ejaculation. Physical therapy. 2014 Dec 1;94(12):1731-43.

Reason: Not RCT.

6. Bocker B, 2002

Physikalische therapie der beckenbodeninsuffizienz (Physical therapy for pelvic floor insufficiency -- comparison of methods)

Reason: RCT evaluating Urinary incontinence.

7. Garcia M, 2015

Design and early clinical experience with a tactile feedback driven pelvic floor muscle training smartphone App.

Reason: Not RCT.

8. Reducing adverse effects of treatments for prostate cancer

Reason; Not RCT.

9. Karlsen, Randi V. 2017

Feasibility and acceptability of couple counselling and pelvic floor muscle training after operation for prostate cancer

Reason: Single-arm trial (no control group).

10. Meldrum, David R. 2014

Erectile Hydraulics: Maximizing Inflow While Minimizing Outflow

Reason: Review.

11. Sighinolfi, Maria Chiara, 2009

Potential Effectiveness of Pelvic Floor Rehabilitation Treatment for Postradical Prostatectomy Incontinence, Climacturia, and Erectile Dysfunction: A Case Series

Reason: Not RCT.

12. Geraerts, I. 2016

Pelvic floor muscle training for erectile dysfunction and climacturia 1 year after nerve sparing radical prostatectomy: a randomized controlled trial

Reason: Conference paper.

13. Goonewardene SS, 2018

A systematic review of PFE pre-prostatectomy.

Reason: Review.

14. Tafuri A, 2018

A pilor randomized trial of preoperative pelvic floor muscle exercise vs usual care to improve sexual function and health related qulaity of live after RARP: Preliminary disappointed results.

Reason: Conference paper.
